# Supplementary figures and images for: Hydrodynamic trapping of Tetrahymena thermophila for the long-term monitoring of cell behaviors
Source: Royal Society of Chemistry journal article supplement (doi:10.1039/c2lc40367f), 2012-01-01

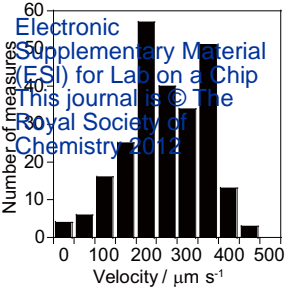

Supplement: c2lc40367f.pdf [file c2lc40367f.pdf]

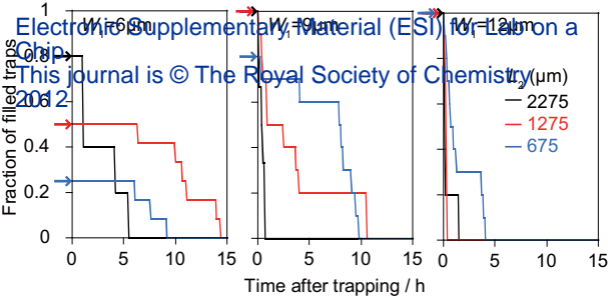

Supplement: c2lc40367f_2.pdf [file c2lc40367f_2.pdf]

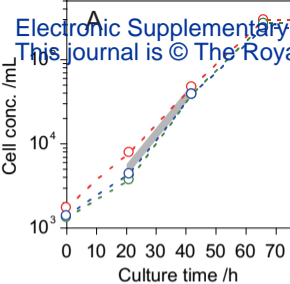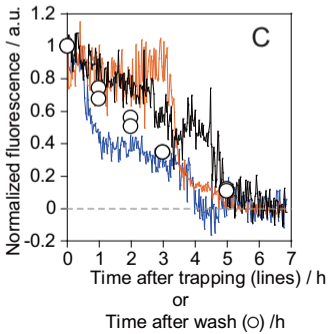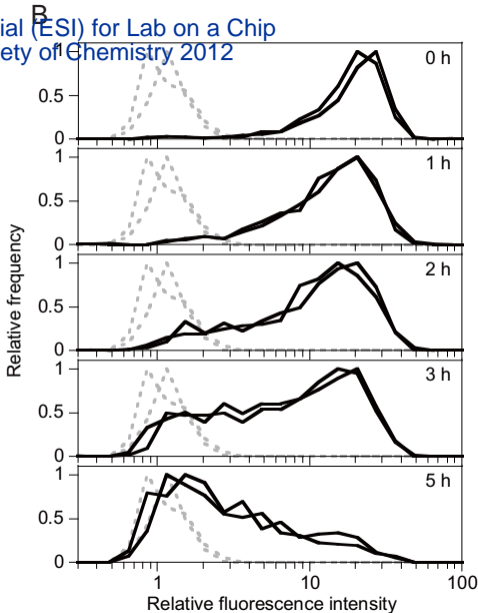

Supplement: c2lc40367f_3.pdf [file c2lc40367f_3.pdf]

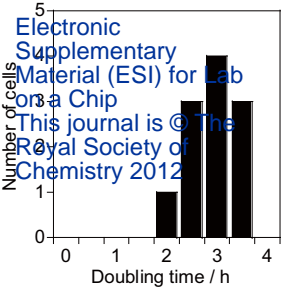

Supplement: c2lc40367f_4.pdf [file c2lc40367f_4.pdf]
